# Supplementary material
Source: Research Square preprint supplement (doi:10.21203/rs.3.rs-9006017/v1)
Supplement: Supplementary file 1 [file 3b8fc2e5a0fbf4b3af89dc8f.xlsx]

## Sheet: Fig. 2a
Detailed statistical information
Figure	Cell type	Marker	Statistical method	Wilcoxon W statistic	P value	Adjusted P value (BH)	Sample size
2a	Astrocyte	TDP-43	Two-sided Wilcoxon rank-sum test	632516	2.30321e-17	5.75802e-17	ALS (n = 1166), AC (n = 1349)
	Astrocyte	pTDP-43	Two-sided Wilcoxon rank-sum test	1.31068e+06	3.19434e-183	9.58301e-182	ALS (n = 1166), AC (n = 1349)
	Astrocyte	FUS	Two-sided Wilcoxon rank-sum test	867298	8.54914e-06	1.28237e-05	ALS (n = 1166), AC (n = 1349)
	Astrocyte	ATXN2	Two-sided Wilcoxon rank-sum test	939088	4.3103e-17	9.94684e-17	ALS (n = 1166), AC (n = 1349)
	Astrocyte	UBQLN2	Two-sided Wilcoxon rank-sum test	1.29961e+06	1.17964e-175	1.17964e-174	ALS (n = 1166), AC (n = 1349)
	Astrocyte	APOE	Two-sided Wilcoxon rank-sum test	1.01648e+06	9.14221e-37	3.42833e-36	ALS (n = 1166), AC (n = 1349)
	Astrocyte	TBK1	Two-sided Wilcoxon rank-sum test	659499	2.71871e-12	5.09758e-12	ALS (n = 1166), AC (n = 1349)
	Astrocyte	pTBK1	Two-sided Wilcoxon rank-sum test	884244	7.27889e-08	1.21315e-07	ALS (n = 1166), AC (n = 1349)
	Astrocyte	GLS	Two-sided Wilcoxon rank-sum test	1.3057e+06	8.47293e-180	1.27094e-178	ALS (n = 1166), AC (n = 1349)
	Astrocyte	SQSTM1	Two-sided Wilcoxon rank-sum test	797654	0.537918	0.556466	ALS (n = 1166), AC (n = 1349)
	Astrocyte	CH24H	Two-sided Wilcoxon rank-sum test	700890	2.43944e-06	3.85175e-06	ALS (n = 1166), AC (n = 1349)
	Astrocyte	ORF1	Two-sided Wilcoxon rank-sum test	767282	0.290757	0.348908	ALS (n = 1166), AC (n = 1349)
	Astrocyte	IL6ST	Two-sided Wilcoxon rank-sum test	985894	4.68715e-28	1.56238e-27	ALS (n = 1166), AC (n = 1349)
	Astrocyte	PD-1	Two-sided Wilcoxon rank-sum test	818408	0.0758217	0.0947771	ALS (n = 1166), AC (n = 1349)
	Astrocyte	PD-L1	Two-sided Wilcoxon rank-sum test	801960	0.393581	0.437312	ALS (n = 1166), AC (n = 1349)
	Astrocyte	PD-L2	Two-sided Wilcoxon rank-sum test	803246	0.355528	0.410225	ALS (n = 1166), AC (n = 1349)
	Astrocyte	TREM2	Two-sided Wilcoxon rank-sum test	1.12618e+06	4.38298e-78	2.62979e-77	ALS (n = 1166), AC (n = 1349)
	Astrocyte	MHCII	Two-sided Wilcoxon rank-sum test	795878	0.604303	0.604303	ALS (n = 1166), AC (n = 1349)
	Immune	TDP-43	Two-sided Wilcoxon rank-sum test	73785	4.47502e-06	7.06582e-06	ALS (n = 370), AC (n = 488)
	Immune	pTDP-43	Two-sided Wilcoxon rank-sum test	149262	1.73428e-60	2.60142e-59	ALS (n = 370), AC (n = 488)
	Immune	FUS	Two-sided Wilcoxon rank-sum test	119868	1.87236e-16	5.20205e-16	ALS (n = 370), AC (n = 488)
	Immune	ATXN2	Two-sided Wilcoxon rank-sum test	111809	2.12158e-09	4.54625e-09	ALS (n = 370), AC (n = 488)
	Immune	UBQLN2	Two-sided Wilcoxon rank-sum test	152861	7.30623e-68	2.19187e-66	ALS (n = 370), AC (n = 488)
	Immune	APOE	Two-sided Wilcoxon rank-sum test	127371	5.91429e-25	2.21786e-24	ALS (n = 370), AC (n = 488)
	Immune	TBK1	Two-sided Wilcoxon rank-sum test	77379	0.000332807	0.000434097	ALS (n = 370), AC (n = 488)
	Immune	pTBK1	Two-sided Wilcoxon rank-sum test	106386	7.46053e-06	1.11908e-05	ALS (n = 370), AC (n = 488)
	Immune	GLS	Two-sided Wilcoxon rank-sum test	146724	1.51667e-55	1.51667e-54	ALS (n = 370), AC (n = 488)
	Immune	SQSTM1	Two-sided Wilcoxon rank-sum test	109394	1.05857e-07	2.11714e-07	ALS (n = 370), AC (n = 488)
	Immune	CH24H	Two-sided Wilcoxon rank-sum test	88899	0.700881	0.725049	ALS (n = 370), AC (n = 488)
	Immune	ORF1	Two-sided Wilcoxon rank-sum test	96856	0.0673935	0.0777618	ALS (n = 370), AC (n = 488)
	Immune	IL6ST	Two-sided Wilcoxon rank-sum test	120554	3.74285e-17	1.24762e-16	ALS (n = 370), AC (n = 488)
	Immune	PD-1	Two-sided Wilcoxon rank-sum test	93688.5	0.336733	0.374147	ALS (n = 370), AC (n = 488)
	Immune	PD-L1	Two-sided Wilcoxon rank-sum test	103580	0.000215949	0.000294476	ALS (n = 370), AC (n = 488)
	Immune	PD-L2	Two-sided Wilcoxon rank-sum test	99399.5	0.0111971	0.0139963	ALS (n = 370), AC (n = 488)
	Immune	TREM2	Two-sided Wilcoxon rank-sum test	143390	2.19741e-49	1.64806e-48	ALS (n = 370), AC (n = 488)
	Immune	MHCII	Two-sided Wilcoxon rank-sum test	98092	0.0297961	0.0357554	ALS (n = 370), AC (n = 488)
	Excitatory	TDP-43	Two-sided Wilcoxon rank-sum test	1.8563e+06	1.27094e-25	2.54188e-25	ALS (n = 1897), AC (n = 2403)
	Excitatory	pTDP-43	Two-sided Wilcoxon rank-sum test	3.72672e+06	7.62863e-281	7.62863e-280	ALS (n = 1897), AC (n = 2403)
	Excitatory	FUS	Two-sided Wilcoxon rank-sum test	3011584	2.30374e-73	7.67912e-73	ALS (n = 1897), AC (n = 2403)
	Excitatory	ATXN2	Two-sided Wilcoxon rank-sum test	2640363	4.11078e-19	7.25431e-19	ALS (n = 1897), AC (n = 2403)
	Excitatory	UBQLN2	Two-sided Wilcoxon rank-sum test	4.18062e+06	0	0	ALS (n = 1897), AC (n = 2403)
	Excitatory	APOE	Two-sided Wilcoxon rank-sum test	3401965	8.50135e-170	4.25067e-169	ALS (n = 1897), AC (n = 2403)
	Excitatory	TBK1	Two-sided Wilcoxon rank-sum test	1.76871e+06	1.43362e-36	3.30836e-36	ALS (n = 1897), AC (n = 2403)
	Excitatory	pTBK1	Two-sided Wilcoxon rank-sum test	2.46934e+06	2.56204e-06	3.07444e-06	ALS (n = 1897), AC (n = 2403)
	Excitatory	GLS	Two-sided Wilcoxon rank-sum test	3.88138e+06	0	0	ALS (n = 1897), AC (n = 2403)
	Excitatory	SQSTM1	Two-sided Wilcoxon rank-sum test	2394474	0.00436201	0.00451242	ALS (n = 1897), AC (n = 2403)
	Excitatory	CH24H	Two-sided Wilcoxon rank-sum test	2114329	4.47266e-05	4.96962e-05	ALS (n = 1897), AC (n = 2403)
	Excitatory	ORF1	Two-sided Wilcoxon rank-sum test	2078873	7.15173e-07	8.93967e-07	ALS (n = 1897), AC (n = 2403)
	Excitatory	IL6ST	Two-sided Wilcoxon rank-sum test	2560642	3.36249e-12	4.80355e-12	ALS (n = 1897), AC (n = 2403)
	Excitatory	PD-1	Two-sided Wilcoxon rank-sum test	2.39316e+06	0.00429104	0.00451242	ALS (n = 1897), AC (n = 2403)
	Excitatory	PD-L1	Two-sided Wilcoxon rank-sum test	2.375e+06	0.0178339	0.0178339	ALS (n = 1897), AC (n = 2403)
	Excitatory	PD-L2	Two-sided Wilcoxon rank-sum test	2461753	6.32601e-06	7.29924e-06	ALS (n = 1897), AC (n = 2403)
	Excitatory	TREM2	Two-sided Wilcoxon rank-sum test	3.56342e+06	1.67117e-221	1.25338e-220	ALS (n = 1897), AC (n = 2403)
	Excitatory	MHCII	Two-sided Wilcoxon rank-sum test	2542377	7.5253e-11	1.02618e-10	ALS (n = 1897), AC (n = 2403)
	Inhibitory	TDP-43	Two-sided Wilcoxon rank-sum test	59618	0.0105553	0.0143936	ALS (n = 329), AC (n = 407)
	Inhibitory	pTDP-43	Two-sided Wilcoxon rank-sum test	125444	1.79051e-92	5.37154e-91	ALS (n = 329), AC (n = 407)
	Inhibitory	FUS	Two-sided Wilcoxon rank-sum test	88042.5	1.91728e-13	6.39095e-13	ALS (n = 329), AC (n = 407)
	Inhibitory	ATXN2	Two-sided Wilcoxon rank-sum test	78687.5	4.27183e-05	8.00969e-05	ALS (n = 329), AC (n = 407)
	Inhibitory	UBQLN2	Two-sided Wilcoxon rank-sum test	117164	1.21171e-68	1.21171e-67	ALS (n = 329), AC (n = 407)
	Inhibitory	APOE	Two-sided Wilcoxon rank-sum test	98005.5	2.51915e-27	1.07964e-26	ALS (n = 329), AC (n = 407)
	Inhibitory	TBK1	Two-sided Wilcoxon rank-sum test	61087.5	0.040888	0.0454311	ALS (n = 329), AC (n = 407)
	Inhibitory	pTBK1	Two-sided Wilcoxon rank-sum test	72939	0.03682	0.0424846	ALS (n = 329), AC (n = 407)
	Inhibitory	GLS	Two-sided Wilcoxon rank-sum test	114578	6.10501e-62	3.66301e-61	ALS (n = 329), AC (n = 407)
	Inhibitory	SQSTM1	Two-sided Wilcoxon rank-sum test	76546.5	0.000820763	0.00136794	ALS (n = 329), AC (n = 407)
	Inhibitory	CH24H	Two-sided Wilcoxon rank-sum test	64296.5	0.354215	0.354215	ALS (n = 329), AC (n = 407)
	Inhibitory	ORF1	Two-sided Wilcoxon rank-sum test	62224.5	0.0992771	0.1027	ALS (n = 329), AC (n = 407)
	Inhibitory	IL6ST	Two-sided Wilcoxon rank-sum test	85178	2.07649e-10	6.22947e-10	ALS (n = 329), AC (n = 407)
	Inhibitory	PD-1	Two-sided Wilcoxon rank-sum test	74762.5	0.00569226	0.0081318	ALS (n = 329), AC (n = 407)
	Inhibitory	PD-L1	Two-sided Wilcoxon rank-sum test	74181.5	0.011696	0.0152556	ALS (n = 329), AC (n = 407)
	Inhibitory	PD-L2	Two-sided Wilcoxon rank-sum test	76081	0.00145571	0.00229849	ALS (n = 329), AC (n = 407)
	Inhibitory	TREM2	Two-sided Wilcoxon rank-sum test	116181	4.72695e-66	3.54521e-65	ALS (n = 329), AC (n = 407)
	Others	TDP-43	Two-sided Wilcoxon rank-sum test	1437386	5.7961e-24	9.66017e-24	ALS (n = 1798), AC (n = 1974)
	Others	pTDP-43	Two-sided Wilcoxon rank-sum test	2.9702e+06	1.61047e-280	1.61047e-279	ALS (n = 1798), AC (n = 1974)
	Others	FUS	Two-sided Wilcoxon rank-sum test	2.51026e+06	1.80586e-107	6.01952e-107	ALS (n = 1798), AC (n = 1974)
	Others	ATXN2	Two-sided Wilcoxon rank-sum test	2.1822e+06	3.08321e-34	6.16642e-34	ALS (n = 1798), AC (n = 1974)
	Others	UBQLN2	Two-sided Wilcoxon rank-sum test	3079686	0	0	ALS (n = 1798), AC (n = 1974)
	Others	APOE	Two-sided Wilcoxon rank-sum test	2608742	1.31875e-137	6.59373e-137	ALS (n = 1798), AC (n = 1974)
	Others	TBK1	Two-sided Wilcoxon rank-sum test	1.70714e+06	0.0433645	0.0481828	ALS (n = 1798), AC (n = 1974)
	Others	pTBK1	Two-sided Wilcoxon rank-sum test	1.81125e+06	0.272934	0.292429	ALS (n = 1798), AC (n = 1974)
	Others	GLS	Two-sided Wilcoxon rank-sum test	2.99643e+06	6.63503e-293	9.95255e-292	ALS (n = 1798), AC (n = 1974)
	Others	SQSTM1	Two-sided Wilcoxon rank-sum test	2.01751e+06	3.57736e-13	5.36604e-13	ALS (n = 1798), AC (n = 1974)
	Others	CH24H	Two-sided Wilcoxon rank-sum test	1678876	0.00410733	0.00473923	ALS (n = 1798), AC (n = 1974)
	Others	ORF1	Two-sided Wilcoxon rank-sum test	1751043	0.480156	0.496713	ALS (n = 1798), AC (n = 1974)
	Others	IL6ST	Two-sided Wilcoxon rank-sum test	2.27705e+06	4.00853e-51	1.00213e-50	ALS (n = 1798), AC (n = 1974)
	Others	PD-1	Two-sided Wilcoxon rank-sum test	1902887	7.97147e-05	9.56576e-05	ALS (n = 1798), AC (n = 1974)
	Others	PD-L1	Two-sided Wilcoxon rank-sum test	1.91841e+06	1.67085e-05	2.08856e-05	ALS (n = 1798), AC (n = 1974)
	Others	PD-L2	Two-sided Wilcoxon rank-sum test	1.92687e+06	5.17501e-06	6.75002e-06	ALS (n = 1798), AC (n = 1974)
	Others	TREM2	Two-sided Wilcoxon rank-sum test	2810754	3.23399e-211	2.4255e-210	ALS (n = 1798), AC (n = 1974)
	Others	MHCII	Two-sided Wilcoxon rank-sum test	2.33899e+06	4.9574e-64	1.35202e-63	ALS (n = 1798), AC (n = 1974)

## Sheet: Fig. 2c
Detailed statistical information
Figure	Cell type	Sub cell type	A.U.	Sample size (n_cells)
2c, bottom	Astrocyte	ALS Astro_1	59.1722	426
		ALS Astro_2	56.3116	225
		ALS Astro_3	55.8912	203
		ALS Astro_4	45.2163	164
		ALS Astro_5	45.9616	148
		AC Astro_1	26.4945	501
		AC Astro_2	28.887	289
		AC Astro_3	28.3922	273
		AC Astro_4	27.2905	172
		AC Astro_5	27.0849	114
Figure	Sub cell type	Sub cell type	A.U.	Sample size (n_cells)
2c, bottom	Immune cell	ALS Immune_1	56.7289	186
		ALS Immune_2	52.1851	91
		ALS Immune_3	57.3029	93
		AC Immune_1	28.6409	194
		AC Immune_2	28.355	159
		AC Immune_3	26.8269	135
Figure	Sub cell type	Sub cell type	A.U.	Sample size (n_cells)
2c, bottom	Excitatory neuron	ALS Excit_1	43.1589	512
		ALS Excit_2	66.185	377
		ALS Excit_3	50.5019	419
		ALS Excit_4	79.5671	317
		ALS Excit_5	52.3461	272
		AC Excit_1	22.1434	548
		AC Excit_2	29.0452	580
		AC Excit_3	25.6455	470
		AC Excit_4	31.5523	440
		AC Excit_5	25.7766	365

## Sheet: Fig. 2k
Detailed statistical information
Figure	Statistical method	ANOVA F statistic	P value	Tukey–Kramer post hoc P values	Sample size
2k	One-way ANOVA with Tukey–Kramer multiple-comparisons test	F(2, 237) = 5.40	0.0051	ALS-cluster rich vs. poor, p=0.0337 ALS-cluster rich vs. AC, p=0.0055 ALS-cluster poor vs. AC, p=0.8173	ALS-cluster rich (n = 80), ALS-cluster poor (n = 80), AC (n = 80)

## Sheet: Fig. 3a
Detailed statistical information
Figure	Cell type	Marker	Statistical method	P value	Adjusted P value (BH)	Sample size
3a	Astrocyte	TDP-43	Two-sided Wilcoxon rank-sum test	3.78012e-18	6.3002e-18	ALS (n = 2005), AC (n = 3551)
	Astrocyte	pTDP-43	Two-sided Wilcoxon rank-sum test	2.62403e-213	2.62403e-212	ALS (n = 2005), AC (n = 3551)
	Astrocyte	FUS	Two-sided Wilcoxon rank-sum test	1.26947e-08	1.46477e-08	ALS (n = 2005), AC (n = 3551)
	Astrocyte	ATXN2	Two-sided Wilcoxon rank-sum test	4.70679e-30	9.41359e-30	ALS (n = 2005), AC (n = 3551)
	Astrocyte	UBQLN2	Two-sided Wilcoxon rank-sum test	8.05873e-158	3.45374e-157	ALS (n = 2005), AC (n = 3551)
	Astrocyte	APOE	Two-sided Wilcoxon rank-sum test	1.05723e-201	6.3434e-201	ALS (n = 2005), AC (n = 3551)
	Astrocyte	TBK1	Two-sided Wilcoxon rank-sum test	9.27466e-29	1.739e-28	ALS (n = 2005), AC (n = 3551)
	Astrocyte	pTBK1	Two-sided Wilcoxon rank-sum test	4.73858e-54	1.42157e-53	ALS (n = 2005), AC (n = 3551)
	Astrocyte	GLS	Two-sided Wilcoxon rank-sum test	1.63052e-45	4.0763e-45	ALS (n = 2005), AC (n = 3551)
	Astrocyte	SQSTM1	Two-sided Wilcoxon rank-sum test	0.0702137	0.0780152	ALS (n = 2005), AC (n = 3551)
	Astrocyte	CH24H	Two-sided Wilcoxon rank-sum test	0.340017	0.351741	ALS (n = 2005), AC (n = 3551)
	Astrocyte	ORF1	Two-sided Wilcoxon rank-sum test	6.82006e-18	1.02301e-17	ALS (n = 2005), AC (n = 3551)
	Astrocyte	IL6ST	Two-sided Wilcoxon rank-sum test	6.85189e-40	1.58121e-39	ALS (n = 2005), AC (n = 3551)
	Astrocyte	PD-1	Two-sided Wilcoxon rank-sum test	0.468158	0.468158	ALS (n = 2005), AC (n = 3551)
	Astrocyte	PD-L1	Two-sided Wilcoxon rank-sum test	0.285691	0.306098	ALS (n = 2005), AC (n = 3551)
	Astrocyte	PD-L2	Two-sided Wilcoxon rank-sum test	3.22888e-28	5.69801e-28	ALS (n = 2005), AC (n = 3551)
	Astrocyte	TREM2	Two-sided Wilcoxon rank-sum test	9.09289e-232	2.72787e-230	ALS (n = 2005), AC (n = 3551)
	Astrocyte	MHCII	Two-sided Wilcoxon rank-sum test	1.38759e-12	1.89217e-12	ALS (n = 2005), AC (n = 3551)
	Immune	TDP-43	Two-sided Wilcoxon rank-sum test	0.0112072	0.0134486	ALS (n = 724), AC (n = 1180)
	Immune	pTDP-43	Two-sided Wilcoxon rank-sum test	9.34406e-45	3.11468e-44	ALS (n = 724), AC (n = 1180)
	Immune	FUS	Two-sided Wilcoxon rank-sum test	3.00678e-09	5.30609e-09	ALS (n = 724), AC (n = 1180)
	Immune	ATXN2	Two-sided Wilcoxon rank-sum test	0.00483262	0.00630341	ALS (n = 724), AC (n = 1180)
	Immune	UBQLN2	Two-sided Wilcoxon rank-sum test	1.29051e-90	1.93577e-89	ALS (n = 724), AC (n = 1180)
	Immune	APOE	Two-sided Wilcoxon rank-sum test	1.20162e-84	1.20162e-83	ALS (n = 724), AC (n = 1180)
	Immune	TBK1	Two-sided Wilcoxon rank-sum test	7.1639e-07	1.19398e-06	ALS (n = 724), AC (n = 1180)
	Immune	pTBK1	Two-sided Wilcoxon rank-sum test	3.35972e-16	7.75321e-16	ALS (n = 724), AC (n = 1180)
	Immune	GLS	Two-sided Wilcoxon rank-sum test	6.02827e-26	1.64407e-25	ALS (n = 724), AC (n = 1180)
	Immune	SQSTM1	Two-sided Wilcoxon rank-sum test	0.457545	0.457545	ALS (n = 724), AC (n = 1180)
	Immune	CH24H	Two-sided Wilcoxon rank-sum test	0.0450952	0.0501058	ALS (n = 724), AC (n = 1180)
	Immune	ORF1	Two-sided Wilcoxon rank-sum test	8.86036e-07	1.399e-06	ALS (n = 724), AC (n = 1180)
	Immune	IL6ST	Two-sided Wilcoxon rank-sum test	0.0211703	0.0244272	ALS (n = 724), AC (n = 1180)
	Immune	PD-1	Two-sided Wilcoxon rank-sum test	0.00158464	0.00216087	ALS (n = 724), AC (n = 1180)
	Immune	PD-L1	Two-sided Wilcoxon rank-sum test	0.257519	0.275913	ALS (n = 724), AC (n = 1180)
	Immune	PD-L2	Two-sided Wilcoxon rank-sum test	6.81394e-10	1.27761e-09	ALS (n = 724), AC (n = 1180)
	Immune	TREM2	Two-sided Wilcoxon rank-sum test	7.10547e-73	4.26328e-72	ALS (n = 724), AC (n = 1180)
	Immune	MHCII	Two-sided Wilcoxon rank-sum test	0.00773705	0.00967132	ALS (n = 724), AC (n = 1180)
	Neuron	TDP-43	Two-sided Wilcoxon rank-sum test	0.00813628	0.00938801	ALS (n = 579), AC (n = 1391)
	Neuron	pTDP-43	Two-sided Wilcoxon rank-sum test	2.17689e-40	1.30613e-39	ALS (n = 579), AC (n = 1391)
	Neuron	FUS	Two-sided Wilcoxon rank-sum test	1.35827e-10	2.0374e-10	ALS (n = 579), AC (n = 1391)
	Neuron	ATXN2	Two-sided Wilcoxon rank-sum test	1.3983e-09	1.90677e-09	ALS (n = 579), AC (n = 1391)
	Neuron	UBQLN2	Two-sided Wilcoxon rank-sum test	1.2523e-57	1.87846e-56	ALS (n = 579), AC (n = 1391)
	Neuron	APOE	Two-sided Wilcoxon rank-sum test	6.58112e-29	1.97434e-28	ALS (n = 579), AC (n = 1391)
	Neuron	TBK1	Two-sided Wilcoxon rank-sum test	5.57418e-15	1.11484e-14	ALS (n = 579), AC (n = 1391)
	Neuron	pTBK1	Two-sided Wilcoxon rank-sum test	2.30723e-20	6.29245e-20	ALS (n = 579), AC (n = 1391)
	Neuron	GLS	Two-sided Wilcoxon rank-sum test	5.57497e-31	2.09061e-30	ALS (n = 579), AC (n = 1391)
	Neuron	SQSTM1	Two-sided Wilcoxon rank-sum test	0.121063	0.134515	ALS (n = 579), AC (n = 1391)
	Neuron	CH24H	Two-sided Wilcoxon rank-sum test	0.373808	0.400508	ALS (n = 579), AC (n = 1391)
	Neuron	ORF1	Two-sided Wilcoxon rank-sum test	2.77048e-20	6.9262e-20	ALS (n = 579), AC (n = 1391)
	Neuron	IL6ST	Two-sided Wilcoxon rank-sum test	4.83477e-20	1.11572e-19	ALS (n = 579), AC (n = 1391)
	Neuron	PD-1	Two-sided Wilcoxon rank-sum test	0.641874	0.641874	ALS (n = 579), AC (n = 1391)
	Neuron	PD-L1	Two-sided Wilcoxon rank-sum test	9.63806e-05	0.000115657	ALS (n = 579), AC (n = 1391)
	Neuron	PD-L2	Two-sided Wilcoxon rank-sum test	2.08289e-30	6.94296e-30	ALS (n = 579), AC (n = 1391)
	Neuron	TREM2	Two-sided Wilcoxon rank-sum test	1.05657e-84	3.16972e-83	ALS (n = 579), AC (n = 1391)
	Neuron	MHCII	Two-sided Wilcoxon rank-sum test	4.55789e-13	8.04333e-13	ALS (n = 579), AC (n = 1391)
	Others	TDP-43	Two-sided Wilcoxon rank-sum test	1.01063e-07	1.37814e-07	ALS (n = 3345), AC (n = 3568)
	Others	pTDP-43	Two-sided Wilcoxon rank-sum test	0	0	ALS (n = 3345), AC (n = 3568)
	Others	FUS	Two-sided Wilcoxon rank-sum test	2.0024e-05	2.503e-05	ALS (n = 3345), AC (n = 3568)
	Others	ATXN2	Two-sided Wilcoxon rank-sum test	4.88849e-29	9.16592e-29	ALS (n = 3345), AC (n = 3568)
	Others	UBQLN2	Two-sided Wilcoxon rank-sum test	0	0	ALS (n = 3345), AC (n = 3568)
	Others	APOE	Two-sided Wilcoxon rank-sum test	7.76712e-239	3.32876e-238	ALS (n = 3345), AC (n = 3568)
	Others	TBK1	Two-sided Wilcoxon rank-sum test	1.69806e-34	3.6387e-34	ALS (n = 3345), AC (n = 3568)
	Others	pTBK1	Two-sided Wilcoxon rank-sum test	2.7001e-39	6.75025e-39	ALS (n = 3345), AC (n = 3568)
	Others	GLS	Two-sided Wilcoxon rank-sum test	4.30364e-45	1.29109e-44	ALS (n = 3345), AC (n = 3568)
	Others	SQSTM1	Two-sided Wilcoxon rank-sum test	0.968886	0.968886	ALS (n = 3345), AC (n = 3568)
	Others	CH24H	Two-sided Wilcoxon rank-sum test	0.310036	0.332181	ALS (n = 3345), AC (n = 3568)
	Others	ORF1	Two-sided Wilcoxon rank-sum test	1.25907e-15	1.88861e-15	ALS (n = 3345), AC (n = 3568)
	Others	IL6ST	Two-sided Wilcoxon rank-sum test	3.95901e-24	6.98649e-24	ALS (n = 3345), AC (n = 3568)
	Others	PD-1	Two-sided Wilcoxon rank-sum test	0.000942346	0.00113082	ALS (n = 3345), AC (n = 3568)
	Others	PD-L1	Two-sided Wilcoxon rank-sum test	0.149256	0.16584	ALS (n = 3345), AC (n = 3568)
	Others	PD-L2	Two-sided Wilcoxon rank-sum test	1.72066e-22	2.86777e-22	ALS (n = 3345), AC (n = 3568)
	Others	TREM2	Two-sided Wilcoxon rank-sum test	3.25428e-263	1.62714e-262	ALS (n = 3345), AC (n = 3568)
	Others	MHCII	Two-sided Wilcoxon rank-sum test	3.09392e-06	4.03555e-06	ALS (n = 3345), AC (n = 3568)

## Sheet: Fig. 3c
Detailed statistical information
Figure	Cell type	Sub cell type	A.U.	Sample size (n_cells)
3c, bottom	Astrocyte	ALS Astro_1	49.6927	656
		ALS Astro_2	53.7232	418
		ALS Astro_3	45.7176	394
		ALS Astro_4	55.4393	246
		ALS Astro_5	54.8359	141
		ALS Astro_6	62.6738	150
		AC Astro_1	32.1298	1109
		AC Astro_2	29.9704	896
		AC Astro_3	32.7915	712
		AC Astro_4	35.3824	352
		AC Astro_5	36.078	251
		AC Astro_6	47.8548	231
Figure	Sub cell type	Sub cell type	A.U.	Sample size (n_cells)
3c, bottom	Immune cell	ALS Immune_1	48.453	262
		ALS Immune_2	49.4342	207
		ALS Immune_3	55.5848	255
		AC Immune_1	32.2929	470
		AC Immune_2	33.474	400
		AC Immune_3	33.8292	310
Figure	Sub cell type	Sub cell type	A.U.	Sample size (n_cells)
3c, bottom	Neuron	ALS Excit_1	45.9846	140
		ALS Excit_2	70.9056	162
		ALS Excit_3	43.0966	88
		ALS Excit_4	53.5106	111
		ALS Excit_5	71.7567	64
		AC Excit_1	30.4482	426
		AC Excit_2	41.3348	274
		AC Excit_3	28.6688	312
		AC Excit_4	32.0925	246
		AC Excit_5	36.4717	133

## Sheet: Fig. 3h
Detailed statistical information
Figure	Statistical method	ANOVA F statistic	P value	Tukey–Kramer post hoc P values	Sample size
3h	One-way ANOVA with Tukey–Kramer multiple-comparisons test	F(2, 93) = 28.81	1.8273e-10	ALS-cluster rich vs. poor, p=0.0001 ALS-cluster rich vs. AC, p=0.0000 ALS-cluster poor vs. AC, p=0.0078	ALS-cluster rich (n = 32), ALS-cluster poor (n = 32), AC (n = 32)

## Sheet: Fig. 5a,b
Detailed statistical information
Figure	Cell type	Protein	Statistical method	Effect	ANOVA F statistic	P value	Tukey–Kramer post hoc P values	Sample size
5a	Iba1(+)	GLS	Two-way ANOVA with Tukey–Kramer multiple-comparisons test	Disease（ALS vs. AC）	F(1, 29) = 17.79	0.000220517	ALS_pTDP-43(+) vs. AC_pTDP-43(+), p=0.0003637 ALS_pTDP-43(+) vs. ALS_pTDP-43(-), p=0.003973 ALS_pTDP-43(+) vs. AC_pTDP-43(-), p=3.629e-05 AC_pTDP-43(+) vs. ALS_pTDP-43(-), p=0.9024 AC_pTDP-43(+) vs. AC_pTDP-43(-), p=0.8557 ALS_pTDP-43(-) vs. AC_pTDP-43(-), p=0.478	ALS_pTDP43(+) (n=10), ALS_pTDP43(-) (n=7), AC_pTDP43(+) (n=8), AC_pTDP43(-) (n=8)
				pTDP-43（pos vs. neg）	F(1, 29) = 10.30	0.0032339
				Disease x pTDP-43	F(1, 29) = 4.31	0.0468347
		GLS2	Two-way ANOVA with Tukey–Kramer multiple-comparisons test	Disease（ALS vs. AC）	F(1, 29) = 5.31	0.0286275	ALS_pTDP-43(+) vs. AC_pTDP-43(+), p=0.2606 ALS_pTDP-43(+) vs. ALS_pTDP-43(-), p=0.7282 ALS_pTDP-43(+) vs. AC_pTDP-43(-), p=0.08646 AC_pTDP-43(+) vs. ALS_pTDP-43(-), p=0.848 AC_pTDP-43(+) vs. AC_pTDP-43(-), p=0.9382 ALS_pTDP-43(-) vs. AC_pTDP-43(-), p=0.5158	ALS_pTDP43(+) (n=9),_x000D_ ALS_pTDP43(-) (n=8),_x000D_ AC_pTDP43(+) (n=8),_x000D_ AC_pTDP43(-) (n=8)
				pTDP-43（pos vs. neg）	F(1, 29) = 1.29	0.264465
				Disease x pTDP-43	F(1, 29) = 0.10	0.758535
		p53	Two-way ANOVA with Tukey–Kramer multiple-comparisons test	Disease（ALS vs. AC）	F(1, 31) = 29.00	7.12584e-06	ALS_pTDP-43(+) vs. AC_pTDP-43(+), p=0.0001103 ALS_pTDP-43(+) vs. ALS_pTDP-43(-), p=0.00464 ALS_pTDP-43(+) vs. AC_pTDP-43(-), p=7.177e-07 AC_pTDP-43(+) vs. ALS_pTDP-43(-), p=0.7894 AC_pTDP-43(+) vs. AC_pTDP-43(-), p=0.2241 ALS_pTDP-43(-) vs. AC_pTDP-43(-), p=0.05186	ALS_pTDP43(+) (n=9),_x000D_ ALS_pTDP43(-) (n=7),_x000D_ AC_pTDP43(+) (n=10),_x000D_ AC_pTDP43(-) (n=9)
				pTDP-43（pos vs. neg）	F(1, 31) = 16.33	0.000325429
				Disease x pTDP-43	F(1, 31) = 1.95	0.172154
	GFAP(+)	GLS	Two-way ANOVA with Tukey–Kramer multiple-comparisons test	Disease（ALS vs. AC）	F(1, 32) = 4.85	0.0349	ALS_pTDP-43(+) vs. AC_pTDP-43(+), p=0.009456 ALS_pTDP-43(+) vs. ALS_pTDP-43(-), p=0.006389 ALS_pTDP-43(+) vs. AC_pTDP-43(-), p=0.003854 AC_pTDP-43(+) vs. ALS_pTDP-43(-), p=0.9821 AC_pTDP-43(+) vs. AC_pTDP-43(-), p=0.9949 ALS_pTDP-43(-) vs. AC_pTDP-43(-), p=0.9986	ALS_pTDP43(+) (n=10),_x000D_ ALS_pTDP43(-) (n=7),_x000D_ AC_pTDP43(+) (n=9),_x000D_ AC_pTDP43(-) (n=10)
				pTDP-43（pos vs. neg）	F(1, 32) = 7.62	0.0095
				Disease x pTDP-43	F(1, 32) = 5.90	0.0209
		GLS2	Two-way ANOVA with Tukey–Kramer multiple-comparisons test	Disease（ALS vs. AC）	F(1, 31) = 10.47	0.00287965	ALS_pTDP-43(+) vs. AC_pTDP-43(+), p=0.04852 ALS_pTDP-43(+) vs. ALS_pTDP-43(-), p=0.6761 ALS_pTDP-43(+) vs. AC_pTDP-43(-), p=0.01481 AC_pTDP-43(+) vs. ALS_pTDP-43(-), p=0.5144 AC_pTDP-43(+) vs. AC_pTDP-43(-), p=0.9361 ALS_pTDP-43(-) vs. AC_pTDP-43(-), p=0.2519	ALS_pTDP43(+) (n=9),_x000D_ ALS_pTDP43(-) (n=7),_x000D_ AC_pTDP43(+) (n=10),_x000D_ AC_pTDP43(-) (n=9)
				pTDP-43（pos vs. neg）	F(1, 31) = 1.50	0.229356
				Disease x pTDP-43	F(1, 31) = 0.19	0.663703
		p53	Two-way ANOVA with Tukey–Kramer multiple-comparisons test	Disease（ALS vs. AC）	F(1, 30) = 10.48	0.0029417	ALS_pTDP-43(+) vs. AC_pTDP-43(+), p=0.02088 ALS_pTDP-43(+) vs. ALS_pTDP-43(-), p=0.3284 ALS_pTDP-43(+) vs. AC_pTDP-43(-), p=0.02413 AC_pTDP-43(+) vs. ALS_pTDP-43(-), p=0.4507 AC_pTDP-43(+) vs. AC_pTDP-43(-), p=1 ALS_pTDP-43(-) vs. AC_pTDP-43(-), p=0.4534	ALS_pTDP43(+) (n=9),_x000D_ ALS_pTDP43(-) (n=10),_x000D_ AC_pTDP43(+) (n=8),_x000D_ AC_pTDP43(-) (n=7)
				pTDP-43（pos vs. neg）	F(1, 30) = 1.40	0.246282
				Disease x pTDP-43	F(1, 30) = 1.23	0.276129
	NeuN(+)	GLS	Two-way ANOVA with Tukey–Kramer multiple-comparisons test	Disease（ALS vs. AC）	F(1, 24) = 24.44	4.79746e-05	ALS_pTDP-43(+) vs. AC_pTDP-43(+), p=0.0008951 ALS_pTDP-43(+) vs. ALS_pTDP-43(-), p=0.2235 ALS_pTDP-43(+) vs. AC_pTDP-43(-), p=0.000584 AC_pTDP-43(+) vs. ALS_pTDP-43(-), p=0.07872 AC_pTDP-43(+) vs. AC_pTDP-43(-), p=0.9935 ALS_pTDP-43(-) vs. AC_pTDP-43(-), p=0.0862	ALS_pTDP43(+) (n=9),_x000D_ ALS_pTDP43(-) (n=7),_x000D_ AC_pTDP43(+) (n=5),_x000D_ AC_pTDP43(-) (n=7)
				pTDP-43（pos vs. neg）	F(1, 24) = 1.19	0.285555
				Disease x pTDP-43	F(1, 24) = 2.22	0.149209
		GLS2	Two-way ANOVA with Tukey–Kramer multiple-comparisons test	Disease（ALS vs. AC）	F(1, 35) = 7.82	0.00832338	ALS_pTDP-43(+) vs. AC_pTDP-43(+), p=0.06343 ALS_pTDP-43(+) vs. ALS_pTDP-43(-), p=0.5275 ALS_pTDP-43(+) vs. AC_pTDP-43(-), p=0.03722 AC_pTDP-43(+) vs. ALS_pTDP-43(-), p=0.6589 AC_pTDP-43(+) vs. AC_pTDP-43(-), p=0.9955 ALS_pTDP-43(-) vs. AC_pTDP-43(-), p=0.5192	ALS_pTDP43(+) (n=10),_x000D_ ALS_pTDP43(-) (n=9),_x000D_ AC_pTDP43(+) (n=10),_x000D_ AC_pTDP43(-) (n=10)
				pTDP-43（pos vs. neg）	F(1, 35) = 1.31	0.26099
				Disease x pTDP-43	F(1, 35) = 0.67	0.419188
		p53	Two-way ANOVA with Tukey–Kramer multiple-comparisons test	Disease（ALS vs. AC）	F(1, 29) = 44.73	2.45948e-07	ALS_pTDP-43(+) vs. AC_pTDP-43(+), p=3.597e-07 ALS_pTDP-43(+) vs. ALS_pTDP-43(-), p=4.313e-05 ALS_pTDP-43(+) vs. AC_pTDP-43(-), p=2.42e-08 AC_pTDP-43(+) vs. ALS_pTDP-43(-), p=0.4881 AC_pTDP-43(+) vs. AC_pTDP-43(-), p=0.7147 ALS_pTDP-43(-) vs. AC_pTDP-43(-), p=0.08771	ALS_pTDP43(+) (n=10),_x000D_ ALS_pTDP43(-) (n=7),_x000D_ AC_pTDP43(+) (n=8),_x000D_ AC_pTDP43(-) (n=8)
				pTDP-43（pos vs. neg）	F(1, 29) = 20.90	8.33964e-05
				Disease x pTDP-43	F(1, 29) = 9.35	0.00475382
	Olig2(+)	GLS	Two-way ANOVA with Tukey–Kramer multiple-comparisons test	Disease（ALS vs. AC）	F(1, 24) = 0.12	0.729053	ALS_pTDP-43(+) vs. AC_pTDP-43(+), p=0.8966 ALS_pTDP-43(+) vs. ALS_pTDP-43(-), p=0.7352 ALS_pTDP-43(+) vs. AC_pTDP-43(-), p=0.8423 AC_pTDP-43(+) vs. ALS_pTDP-43(-), p=0.9874 AC_pTDP-43(+) vs. AC_pTDP-43(-), p=0.9993 ALS_pTDP-43(-) vs. AC_pTDP-43(-), p=0.997	ALS_pTDP43(+) (n=7),_x000D_ ALS_pTDP43(-) (n=7),_x000D_ AC_pTDP43(+) (n=7),_x000D_ AC_pTDP43(-) (n=7)
				pTDP-43（pos vs. neg）	F(1, 24) = 0.67	0.422725
				Disease x pTDP-43	F(1, 24) = 0.41	0.529808
		GLS2	Two-way ANOVA with Tukey–Kramer multiple-comparisons test	Disease（ALS vs. AC）	F(1, 27) = 0.96	0.335002	ALS_pTDP-43(+) vs. AC_pTDP-43(+), p=0.4721 ALS_pTDP-43(+) vs. ALS_pTDP-43(-), p=0.2663 ALS_pTDP-43(+) vs. AC_pTDP-43(-), p=0.3127 AC_pTDP-43(+) vs. ALS_pTDP-43(-), p=0.9864 AC_pTDP-43(+) vs. AC_pTDP-43(-), p=0.9951 ALS_pTDP-43(-) vs. AC_pTDP-43(-), p=0.9996	ALS_pTDP43(+) (n=8),_x000D_ ALS_pTDP43(-) (n=8),_x000D_ AC_pTDP43(+) (n=7),_x000D_ AC_pTDP43(-) (n=8)
				pTDP-43（pos vs. neg）	F(1, 27) = 2.15	0.153714
				Disease x pTDP-43	F(1, 27) = 1.26	0.270674
		p53	Two-way ANOVA with Tukey–Kramer multiple-comparisons test	Disease（ALS vs. AC）	F(1, 29) = 6.09	0.0197053	ALS_pTDP-43(+) vs. AC_pTDP-43(+), p=0.07805 ALS_pTDP-43(+) vs. ALS_pTDP-43(-), p=0.6284 ALS_pTDP-43(+) vs. AC_pTDP-43(-), p=0.1749 AC_pTDP-43(+) vs. ALS_pTDP-43(-), p=0.5379 AC_pTDP-43(+) vs. AC_pTDP-43(-), p=0.9934 ALS_pTDP-43(-) vs. AC_pTDP-43(-), p=0.7499	ALS_pTDP43(+) (n=8),_x000D_ ALS_pTDP43(-) (n=9),_x000D_ AC_pTDP43(+) (n=9),_x000D_ AC_pTDP43(-) (n=7)
				pTDP-43（pos vs. neg）	F(1, 29) = 0.42	0.523149
				Disease x pTDP-43	F(1, 29) = 1.05	0.312895
5b	Iba1(+)	GLS	Two-way ANOVA with Tukey–Kramer multiple-comparisons test	Disease（ALS vs. AC）	F(1, 32) = 18.15	0.000167895	ALS_pTDP-43(+) vs. AC_pTDP-43(+), p=0.002258 ALS_pTDP-43(+) vs. ALS_pTDP-43(-), p=0.2183 ALS_pTDP-43(+) vs. AC_pTDP-43(-), p=0.002167 AC_pTDP-43(+) vs. ALS_pTDP-43(-), p=0.1835 AC_pTDP-43(+) vs. AC_pTDP-43(-), p=1 ALS_pTDP-43(-) vs. AC_pTDP-43(-), p=0.1786	ALS_pTDP43(+) (n=10),_x000D_ ALS_pTDP43(-) (n=10),_x000D_ AC_pTDP43(+) (n=8),_x000D_ AC_pTDP43(-) (n=8)
				pTDP-43（pos vs. neg）	F(1, 32) = 1.76	0.19368
				Disease x pTDP-43	F(1, 32) = 1.71	0.200758
		GLS2	Two-way ANOVA with Tukey–Kramer multiple-comparisons test	Disease（ALS vs. AC）	F(1, 27) = 1.51	0.230056	ALS_pTDP-43(+) vs. AC_pTDP-43(+), p=0.7042 ALS_pTDP-43(+) vs. ALS_pTDP-43(-), p=0.99 ALS_pTDP-43(+) vs. AC_pTDP-43(-), p=0.7485 AC_pTDP-43(+) vs. ALS_pTDP-43(-), p=0.8845 AC_pTDP-43(+) vs. AC_pTDP-43(-), p=1 ALS_pTDP-43(-) vs. AC_pTDP-43(-), p=0.9047	ALS_pTDP43(+) (n=8),_x000D_ ALS_pTDP43(-) (n=7),_x000D_ AC_pTDP43(+) (n=9),_x000D_ AC_pTDP43(-) (n=7)
				pTDP-43（pos vs. neg）	F(1, 27) = 0.04	0.834902
				Disease x pTDP-43	F(1, 27) = 0.05	0.823312
		p53	Two-way ANOVA with Tukey–Kramer multiple-comparisons test	Disease（ALS vs. AC）	F(1, 29) = 36.06	1.57027e-06	ALS_pTDP-43(+) vs. AC_pTDP-43(+), p=1.706e-05 ALS_pTDP-43(+) vs. ALS_pTDP-43(-), p=0.04605 ALS_pTDP-43(+) vs. AC_pTDP-43(-), p=2.69e-05 AC_pTDP-43(+) vs. ALS_pTDP-43(-), p=0.0317 AC_pTDP-43(+) vs. AC_pTDP-43(-), p=0.9985 ALS_pTDP-43(-) vs. AC_pTDP-43(-), p=0.04576	ALS_pTDP43(+) (n=9),_x000D_ ALS_pTDP43(-) (n=8),_x000D_ AC_pTDP43(+) (n=8),_x000D_ AC_pTDP43(-) (n=8)
				pTDP-43（pos vs. neg）	F(1, 29) = 3.27	0.080856
				Disease x pTDP-43	F(1, 29) = 4.16	0.0505095
	GFAP(+)	GLS	Two-way ANOVA with Tukey–Kramer multiple-comparisons test	Disease（ALS vs. AC）	F(1, 27) = 8.52	0.00701043	ALS_pTDP-43(+) vs. AC_pTDP-43(+), p=0.00557 ALS_pTDP-43(+) vs. ALS_pTDP-43(-), p=0.01785 ALS_pTDP-43(+) vs. AC_pTDP-43(-), p=0.003643 AC_pTDP-43(+) vs. ALS_pTDP-43(-), p=0.9713 AC_pTDP-43(+) vs. AC_pTDP-43(-), p=0.9987 ALS_pTDP-43(-) vs. AC_pTDP-43(-), p=0.9334	ALS_pTDP43(+) (n=10),_x000D_ ALS_pTDP43(-) (n=7),_x000D_ AC_pTDP43(+) (n=7),_x000D_ AC_pTDP43(-) (n=7)
				pTDP-43（pos vs. neg）	F(1, 27) = 5.17	0.0311288
				Disease x pTDP-43	F(1, 27) = 4.19	0.0505311
		GLS2	Two-way ANOVA with Tukey–Kramer multiple-comparisons test	Disease（ALS vs. AC）	F(1, 30) = 1.39	0.247129	ALS_pTDP-43(+) vs. AC_pTDP-43(+), p=0.3329 ALS_pTDP-43(+) vs. ALS_pTDP-43(-), p=0.433 ALS_pTDP-43(+) vs. AC_pTDP-43(-), p=0.4333 AC_pTDP-43(+) vs. ALS_pTDP-43(-), p=0.9992 AC_pTDP-43(+) vs. AC_pTDP-43(-), p=0.9999 ALS_pTDP-43(-) vs. AC_pTDP-43(-), p=0.9999	ALS_pTDP43(+) (n=10),_x000D_ ALS_pTDP43(-) (n=8),_x000D_ AC_pTDP43(+) (n=9),_x000D_ AC_pTDP43(-) (n=7)
				pTDP-43（pos vs. neg）	F(1, 30) = 1.00	0.326495
				Disease x pTDP-43	F(1, 30) = 1.21	0.28032
		p53	Two-way ANOVA with Tukey–Kramer multiple-comparisons test	Disease（ALS vs. AC）	F(1, 27) = 3.94	0.0573995	ALS_pTDP-43(+) vs. AC_pTDP-43(+), p=0.06979 ALS_pTDP-43(+) vs. ALS_pTDP-43(-), p=0.1021 ALS_pTDP-43(+) vs. AC_pTDP-43(-), p=0.04832 AC_pTDP-43(+) vs. ALS_pTDP-43(-), p=0.9997 AC_pTDP-43(+) vs. AC_pTDP-43(-), p=0.9939 ALS_pTDP-43(-) vs. AC_pTDP-43(-), p=0.9866	ALS_pTDP43(+) (n=9),_x000D_ ALS_pTDP43(-) (n=7),_x000D_ AC_pTDP43(+) (n=8),_x000D_ AC_pTDP43(-) (n=7)
				pTDP-43（pos vs. neg）	F(1, 27) = 3.44	0.0745353
				Disease x pTDP-43	F(1, 27) = 2.21	0.148494
	NeuN(+)	GLS	Two-way ANOVA with Tukey–Kramer multiple-comparisons test	Disease（ALS vs. AC）	F(1, 29) = 1.54	0.224321	ALS_pTDP-43(+) vs. AC_pTDP-43(+), p=0.09608 ALS_pTDP-43(+) vs. ALS_pTDP-43(-), p=0.05079 ALS_pTDP-43(+) vs. AC_pTDP-43(-), p=0.1829 AC_pTDP-43(+) vs. ALS_pTDP-43(-), p=0.9912 AC_pTDP-43(+) vs. AC_pTDP-43(-), p=0.9878 ALS_pTDP-43(-) vs. AC_pTDP-43(-), p=0.9255	ALS_pTDP43(+) (n=9),_x000D_ ALS_pTDP43(-) (n=8),_x000D_ AC_pTDP43(+) (n=8),_x000D_ AC_pTDP43(-) (n=8)
				pTDP-43（pos vs. neg）	F(1, 29) = 2.76	0.107702
				Disease x pTDP-43	F(1, 29) = 4.53	0.0419782
		GLS2	Two-way ANOVA with Tukey–Kramer multiple-comparisons test	Disease（ALS vs. AC）	F(1, 31) = 10.49	0.00286489	ALS_pTDP-43(+) vs. AC_pTDP-43(+), p=0.08404 ALS_pTDP-43(+) vs. ALS_pTDP-43(-), p=0.9904 ALS_pTDP-43(+) vs. AC_pTDP-43(-), p=0.09765 AC_pTDP-43(+) vs. ALS_pTDP-43(-), p=0.1529 AC_pTDP-43(+) vs. AC_pTDP-43(-), p=1 ALS_pTDP-43(-) vs. AC_pTDP-43(-), p=0.172	ALS_pTDP43(+) (n=9),_x000D_ ALS_pTDP43(-) (n=9),_x000D_ AC_pTDP43(+) (n=9),_x000D_ AC_pTDP43(-) (n=8)
				pTDP-43（pos vs. neg）	F(1, 31) = 0.04	0.834998
				Disease x pTDP-43	F(1, 31) = 0.04	0.836563
		p53	Two-way ANOVA with Tukey–Kramer multiple-comparisons test	Disease（ALS vs. AC）	F(1, 34) = 10.34	0.0028568	ALS_pTDP-43(+) vs. AC_pTDP-43(+), p=0.02468 ALS_pTDP-43(+) vs. ALS_pTDP-43(-), p=0.2668 ALS_pTDP-43(+) vs. AC_pTDP-43(-), p=0.01021 AC_pTDP-43(+) vs. ALS_pTDP-43(-), p=0.6335 AC_pTDP-43(+) vs. AC_pTDP-43(-), p=0.986 ALS_pTDP-43(-) vs. AC_pTDP-43(-), p=0.4219	ALS_pTDP43(+) (n=10),_x000D_ ALS_pTDP43(-) (n=10),_x000D_ AC_pTDP43(+) (n=9),_x000D_ AC_pTDP43(-) (n=9)
				pTDP-43（pos vs. neg）	F(1, 34) = 2.32	0.136857
				Disease x pTDP-43	F(1, 34) = 1.06	0.31125
	Olig2(+)	GLS	Two-way ANOVA with Tukey–Kramer multiple-comparisons test	Disease（ALS vs. AC）	F(1, 35) = 0.00	0.954636	ALS_pTDP-43(+) vs. AC_pTDP-43(+), p=0.9946 ALS_pTDP-43(+) vs. ALS_pTDP-43(-), p=0.9619 ALS_pTDP-43(+) vs. AC_pTDP-43(-), p=0.9891 AC_pTDP-43(+) vs. ALS_pTDP-43(-), p=0.9959 AC_pTDP-43(+) vs. AC_pTDP-43(-), p=0.9999 ALS_pTDP-43(-) vs. AC_pTDP-43(-), p=0.9982	ALS_pTDP43(+) (n=10),_x000D_ ALS_pTDP43(-) (n=10),_x000D_ AC_pTDP43(+) (n=9),_x000D_ AC_pTDP43(-) (n=10)
				pTDP-43（pos vs. neg）	F(1, 35) = 0.14	0.706265
				Disease x pTDP-43	F(1, 35) = 0.09	0.768355
		GLS2	Two-way ANOVA with Tukey–Kramer multiple-comparisons test	Disease（ALS vs. AC）	F(1, 28) = 1.80	0.190994	ALS_pTDP-43(+) vs. AC_pTDP-43(+), p=0.5885 ALS_pTDP-43(+) vs. ALS_pTDP-43(-), p=0.8478 ALS_pTDP-43(+) vs. AC_pTDP-43(-), p=0.4586 AC_pTDP-43(+) vs. ALS_pTDP-43(-), p=0.9765 AC_pTDP-43(+) vs. AC_pTDP-43(-), p=0.9956 ALS_pTDP-43(-) vs. AC_pTDP-43(-), p=0.9234	ALS_pTDP43(+) (n=7),_x000D_ ALS_pTDP43(-) (n=7),_x000D_ AC_pTDP43(+) (n=9),_x000D_ AC_pTDP43(-) (n=9)
				pTDP-43（pos vs. neg）	F(1, 28) = 0.58	0.452209
				Disease x pTDP-43	F(1, 28) = 0.21	0.651061
		p53	Two-way ANOVA with Tukey–Kramer multiple-comparisons test	Disease（ALS vs. AC）	F(1, 29) = 9.22	0.00503028	ALS_pTDP-43(+) vs. AC_pTDP-43(+), p=0.04102 ALS_pTDP-43(+) vs. ALS_pTDP-43(-), p=0.7529 ALS_pTDP-43(+) vs. AC_pTDP-43(-), p=0.05107 AC_pTDP-43(+) vs. ALS_pTDP-43(-), p=0.3993 AC_pTDP-43(+) vs. AC_pTDP-43(-), p=0.9997 ALS_pTDP-43(-) vs. AC_pTDP-43(-), p=0.4026	ALS_pTDP43(+) (n=10),_x000D_ ALS_pTDP43(-) (n=7),_x000D_ AC_pTDP43(+) (n=9),_x000D_ AC_pTDP43(-) (n=7)
				pTDP-43（pos vs. neg）	F(1, 29) = 0.58	0.45299
				Disease x pTDP-43	F(1, 29) = 0.40	0.532468

## Sheet: Supplementary Fig. 1f
Detailed statistical information
Supplementary Figure	Cell type	Gene	Statistical method	Wilcoxon W statistic	P value	Adjusted P value (BH)	Sample size
1f	Astrocyte	GLS	Two-sided Wilcoxon rank-sum test	3.17713e+06	1.67407e-107	1.33926e-106	ALS (n = 2190), PN (n = 2089)
	Astrocyte	GLS2	Two-sided Wilcoxon rank-sum test	38812	2.05463e-25	5.47902e-25	ALS (n = 242), PN (n = 204)
	Astrocyte	TP53	Two-sided Wilcoxon rank-sum test	1.10106e+06	1.03105e-48	4.12418e-48	ALS (n = 1193), PN (n = 1383)
	Astrocyte	MYC	Two-sided Wilcoxon rank-sum test	1415	9.11746e-05	0.000145879	ALS (n = 38), PN (n = 50)
	Microglia	GLS	Two-sided Wilcoxon rank-sum test	677538	7.99798e-13	1.5996e-12	ALS (n = 941), PN (n = 1221)
	Microglia	GLS2	Two-sided Wilcoxon rank-sum test	715	0.432007	0.432007	ALS (n = 28), PN (n = 46)
	Microglia	TP53	Two-sided Wilcoxon rank-sum test	9504	0.0271913	0.0310758	ALS (n = 107), PN (n = 153)
	Microglia	MYC	Two-sided Wilcoxon rank-sum test	408	0.00221758	0.00295678	ALS (n = 16), PN (n = 33)

## Sheet: Supplementary Fig. 1g
Detailed statistical information
Supplementary Figure	Cell type	Gene	Statistical method	ANOVA F statistic	P value	Tukey-Kramer post hoc P values	Sample size
1g	Astrocyte	GLS	One-way ANOVA with Tukey-Kramer multiple-comparisons test	F(3, 4275) = 168.68	2.377e-103	ALS_F vs. ALS_M, p=8.585e-01 ALS_F vs. PN_F, p=3.768e-09 ALS_F vs. PN_M, p=3.768e-09 ALS_M vs. PN_F, p=3.768e-09 ALS_M vs. PN_M, p=3.768e-09 PN_F vs. PN_M, p=1.420e-01	ALS_F (n=1105), ALS_M (n=1085), PN_F (n=1334), PN_M (n=755)
	Astrocyte	GLS2	One-way ANOVA with Tukey-Kramer multiple-comparisons test	F(3, 442) = 45.69	9.83e-26	ALS_F vs. ALS_M, p=9.866e-01 ALS_F vs. PN_F, p=5.020e-09 ALS_F vs. PN_M, p=3.768e-09 ALS_M vs. PN_F, p=3.768e-09 ALS_M vs. PN_M, p=3.768e-09 PN_F vs. PN_M, p=6.457e-02	ALS_F (n=73), ALS_M (n=169), PN_F (n=132), PN_M (n=72)
	Astrocyte	TP53	One-way ANOVA with Tukey-Kramer multiple-comparisons test	F(3, 2572) = 72.52	5.049e-45	ALS_F vs. ALS_M, p=9.999e-01 ALS_F vs. PN_F, p=3.768e-09 ALS_F vs. PN_M, p=3.768e-09 ALS_M vs. PN_F, p=3.768e-09 ALS_M vs. PN_M, p=3.768e-09 PN_F vs. PN_M, p=5.775e-01	ALS_F (n=563), ALS_M (n=630), PN_F (n=832), PN_M (n=551)
	Astrocyte	MYC	One-way ANOVA with Tukey-Kramer multiple-comparisons test	F(3, 84) = 6.13	0.0008005	ALS_F vs. ALS_M, p=4.615e-01 ALS_F vs. PN_F, p=1.220e-01 ALS_F vs. PN_M, p=2.098e-01 ALS_M vs. PN_F, p=1.470e-03 ALS_M vs. PN_M, p=8.619e-03 PN_F vs. PN_M, p=9.974e-01	ALS_F (n=20), ALS_M (n=18), PN_F (n=36), PN_M (n=14)
	Micoglia	GLS	One-way ANOVA with Tukey-Kramer multiple-comparisons test	F(3, 2158) = 17.29	4.315e-11	ALS_F vs. ALS_M, p=2.279e-01 ALS_F vs. PN_F, p=7.130e-08 ALS_F vs. PN_M, p=7.553e-09 ALS_M vs. PN_F, p=3.846e-03 ALS_M vs. PN_M, p=2.353e-04 PN_F vs. PN_M, p=6.299e-01	ALS_F (n=504), ALS_M (n=437), PN_F (n=761), PN_M (n=460)
	Micoglia	GLS2	One-way ANOVA with Tukey-Kramer multiple-comparisons test	F(3, 70) = 0.35	0.789	ALS_F vs. ALS_M, p=9.962e-01 ALS_F vs. PN_F, p=8.746e-01 ALS_F vs. PN_M, p=8.075e-01 ALS_M vs. PN_F, p=9.591e-01 ALS_M vs. PN_M, p=9.115e-01 PN_F vs. PN_M, p=9.952e-01	ALS_F (n=14), ALS_M (n=14), PN_F (n=28), PN_M (n=18)
	Micoglia	TP53	One-way ANOVA with Tukey-Kramer multiple-comparisons test	F(3, 256) = 1.57	0.197	ALS_F vs. ALS_M, p=8.346e-01 ALS_F vs. PN_F, p=1.722e-01 ALS_F vs. PN_M, p=3.873e-01 ALS_M vs. PN_F, p=7.913e-01 ALS_M vs. PN_M, p=8.965e-01 PN_F vs. PN_M, p=9.997e-01	ALS_F (n=61), ALS_M (n=46), PN_F (n=108), PN_M (n=45)
	Micoglia	MYC	One-way ANOVA with Tukey-Kramer multiple-comparisons test	F(3, 45) = 4.14	0.0112	ALS_F vs. ALS_M, p=9.800e-01 ALS_F vs. PN_F, p=2.037e-02 ALS_F vs. PN_M, p=5.292e-02 ALS_M vs. PN_F, p=2.818e-01 ALS_M vs. PN_M, p=2.924e-01 PN_F vs. PN_M, p=9.879e-01	ALS_F (n=11), ALS_M (n=5), PN_F (n=25), PN_M (n=8)

## Sheet: Supplementary Fig. 2a-f
Detailed statistical information
Supplementary Figure	Cell type	Gene	Statistical method	Wilcoxon W statistic	P value	Adjusted P value (BH)	Sample size
2a	L5/6 pyramidal	GLS	Two-sided Wilcoxon rank-sum test	6.38937e+06	2.52319e-12	1.51391e-11	ALS (n = 3527), PN (n = 3300)
	L5/6 pyramidal	GLS2	Two-sided Wilcoxon rank-sum test	2.01266e+06	1.46294e-08	5.85174e-08	ALS (n = 1808), PN (n = 2013)
	L5/6 pyramidal	TP53	Two-sided Wilcoxon rank-sum test	21840	4.44894e-07	1.52535e-06	ALS (n = 178), PN (n = 188)
	L5/6 pyramidal	MYC	Two-sided Wilcoxon rank-sum test	20060	5.91388e-05	0.000157703	ALS (n = 136), PN (n = 236)
2b	PV(+)	GLS	Two-sided Wilcoxon rank-sum test	3714942	0.00077301	0.00154602	ALS (n = 3264), PN (n = 2160)
	PV(+)	GLS2	Two-sided Wilcoxon rank-sum test	630802	1.62739e-16	1.95287e-15	ALS (n = 1114), PN (n = 935)
	PV(+)	TP53	Two-sided Wilcoxon rank-sum test	11087	0.000176303	0.000423127	ALS (n = 147), PN (n = 119)
	PV(+)	MYC	Two-sided Wilcoxon rank-sum test	431	0.0213872	0.0342194	ALS (n = 24), PN (n = 26)
2c	SOM(+)	GLS	Two-sided Wilcoxon rank-sum test	1222379	7.19003e-06	2.15701e-05	ALS (n = 2035), PN (n = 1095)
	SOM(+)	GLS2	Two-sided Wilcoxon rank-sum test	106018	0.0395334	0.0593	ALS (n = 562), PN (n = 349)
	SOM(+)	TP53	Two-sided Wilcoxon rank-sum test	818	0.112392	0.149855	ALS (n = 42), PN (n = 32)
	SOM(+)	MYC	Two-sided Wilcoxon rank-sum test	14	0.834532	0.834532	ALS (n = 5), PN (n = 5)
2d	Oligodendrocyte	GLS	Two-sided Wilcoxon rank-sum test	9274203	0.0195636	0.0335376	ALS (n = 4700), PN (n = 3834)
	Oligodendrocyte	GLS2	Two-sided Wilcoxon rank-sum test	13387	0.754908	0.78773	ALS (n = 145), PN (n = 181)
	Oligodendrocyte	TP53	Two-sided Wilcoxon rank-sum test	62190.5	0.670366	0.766133	ALS (n = 343), PN (n = 356)
	Oligodendrocyte	MYC	Two-sided Wilcoxon rank-sum test	4	0.371093	0.445312	ALS (n = 3), PN (n = 5)
2e	Endothelial	GLS	Two-sided Wilcoxon rank-sum test	44159.5	0.000583202	0.00127244	ALS (n = 500), PN (n = 149)
	Endothelial	GLS2	Two-sided Wilcoxon rank-sum test	18	0.110612	0.149855	ALS (n = 7), PN (n = 3)
	Endothelial	TP53	Two-sided Wilcoxon rank-sum test	316	0.241292	0.30479	ALS (n = 43), PN (n = 12)
	Endothelial	MYC	Two-sided Wilcoxon rank-sum test	98	0.719148	0.784525	ALS (n = 18), PN (n = 10)
2f	OPC	GLS	Two-sided Wilcoxon rank-sum test	3840504	9.61072e-32	2.30657e-30	ALS (n = 2626), PN (n = 2458)
	OPC	GLS2	Two-sided Wilcoxon rank-sum test	31110	1.76935e-15	1.41548e-14	ALS (n = 208), PN (n = 206)
	OPC	TP53	Two-sided Wilcoxon rank-sum test	53335.5	1.61764e-10	7.76468e-10	ALS (n = 261), PN (n = 312)
	OPC	MYC	Two-sided Wilcoxon rank-sum test	2480	0.00505499	0.0093323	ALS (n = 54), PN (n = 71)

[truncated: 4 more sheets: Supplementary Fig. 8a,b, Supplementary Fig. 10f, Supplementary Fig. 11d,h,l, Supplementary Fig. 13a-e]
