# Supplementary material
Source: Research Square preprint supplement (doi:10.21203/rs.3.rs-9006017/v1)
Supplement: Supplementary file 2 [file d4b667a78aa24491cbed7681.xlsx]

## Sheet: Fig. 1g
Fig. 1g	Sample_name	Celltype	Cell count
	1_ALS	Astrocyte	143
		Immune	52
		Excitatory	201
		Inhibitory	35
		Others	226
	2_ALS	Astrocyte	206
		Immune	61
		Excitatory	350
		Inhibitory	84
		Others	283
	4_ALS-1	Astrocyte	291
		Immune	117
		Excitatory	568
		Inhibitory	104
		Others	512
	4_ALS-2	Astrocyte	141
		Immune	40
		Excitatory	298
		Inhibitory	66
		Others	280
	6_ALS	Astrocyte	385
		Immune	100
		Excitatory	480
		Inhibitory	40
		Others	497
	8_AC	Astrocyte	335
		Immune	99
		Excitatory	654
		Inhibitory	116
		Others	480
	9_AC	Astrocyte	269
		Immune	142
		Excitatory	607
		Inhibitory	99
		Others	548
	11_AC	Astrocyte	401
		Immune	133
		Excitatory	730
		Inhibitory	138
		Others	565
	12_AC	Astrocyte	344
		Immune	114
		Excitatory	412
		Inhibitory	54
		Others	381

## Sheet: Fig. 1j
Fig. 1j	Sample_name	Celltype	Cell count
	1_ALS	Astrocyte	494
		Immune	114
		Neuron	162
		Others	830
	2_ALS	Astrocyte	262
		Immune	147
		Neuron	103
		Others	561
	3_ALS	Astrocyte	302
		Immune	94
		Neuron	113
		Others	153
	4_ALS	Astrocyte	367
		Immune	102
		Neuron	117
		Others	736
	6_ALS	Astrocyte	580
		Immune	267
		Neuron	84
		Others	1065
	7_AC-1	Astrocyte	917
		Immune	253
		Neuron	288
		Others	969
	7_AC-2	Astrocyte	345
		Immune	91
		Neuron	72
		Others	69
	8_AC	Astrocyte	456
		Immune	185
		Neuron	289
		Others	195
	9_AC	Astrocyte	500
		Immune	160
		Neuron	277
		Others	850
	11_AC	Astrocyte	728
		Immune	290
		Neuron	262
		Others	636
	12_AC	Astrocyte	605
		Immune	201
		Neuron	203
		Others	849
		Others	381

## Sheet: Fig. 1m
Fig. 1m	Sample_name	Celltype	Cell count
	1_ALS	Astrocyte	545
		Immune	327
		Excitatory	2557
		Inhibitory	276
		Others	284
	2_ALS	Astrocyte	488
		Immune	181
		Excitatory	1410
		Inhibitory	898
		Others	181
	3_ALS	Astrocyte	492
		Immune	215
		Excitatory	1149
		Inhibitory	240
		Others	332
	4_ALS	Astrocyte	675
		Immune	329
		Excitatory	2853
		Inhibitory	218
		Others	603
	6_ALS	Astrocyte	265
		Immune	134
		Excitatory	1575
		Inhibitory	117
		Others	451
	7_AC	Astrocyte	845
		Immune	346
		Excitatory	2840
		Inhibitory	202
		Others	1004
	8_AC	Astrocyte	439
		Immune	287
		Excitatory	2701
		Inhibitory	355
		Others	504
	9_AC	Astrocyte	227
		Immune	316
		Excitatory	2118
		Inhibitory	721
		Others	467
	11_AC	Astrocyte	383
		Immune	202
		Excitatory	1031
		Inhibitory	648
		Others	150
	12_AC	Astrocyte	1074
		Immune	375
		Excitatory	2656
		Inhibitory	126
		Others	2040

## Sheet: Fig. 2k
Fig. 2k	Group	Cell ID	Red-Blue		Group	Cell ID	Red-Blue		Group	Cell ID	Red-Blue
	ALS-cluster rich	#1	3.622		ALS-cluster poor	#1	1.976		AC	#1	-8.638
		#2	2.671			#2	-1.066			#2	-9.108
		#3	4.431			#3	1.855			#3	-8.264
		#4	2.772			#4	1.602			#4	-5.981
		#5	3.143			#5	2.61			#5	-3.29
		#6	-1.104			#6	2.335			#6	-3.869
		#7	-1.321			#7	1.264			#7	-8.914
		#8	3.825			#8	1.906			#8	-8.503
		#9	1.979			#9	2.713			#9	-3.709
		#10	-0.102			#10	2.262			#10	-10.283
		#11	2.304			#11	-0.482			#11	-6.611
		#12	-1.692			#12	-0.558			#12	-6.924
		#13	2.488			#13	2.71			#13	-4.806
		#14	3.428			#14	2.27			#14	-7.747
		#15	1.057			#15	1.813			#15	-8.777
		#16	0.51			#16	-1.143			#16	-0.764
		#17	0.392			#17	-2.531			#17	-4.725
		#18	3.197			#18	-1.83			#18	-8.393
		#19	3.641			#19	5.204			#19	-3.476
		#20	2.891			#20	-3.022			#20	-7.567
		#21	5.948			#21	6.869			#21	4.462
		#22	6.193			#22	7.354			#22	5.726
		#23	6.453			#23	5.778			#23	6.827
		#24	6.825			#24	5.37			#24	5.415
		#25	7.504			#25	7.709			#25	4.753
		#26	5.563			#26	8.051			#26	2.292
		#27	6.906			#27	0.557			#27	2.658
		#28	4.627			#28	6.38			#28	3.249
		#29	6.33			#29	6.045			#29	3.494
		#30	6.124			#30	6.882			#30	4.383
		#31	9.396			#31	7.648			#31	5.635
		#32	6.553			#32	3.443			#32	3.649
		#33	4.833			#33	7.308			#33	4.25
		#34	4.699			#34	6.762			#34	4.992
		#35	7.688			#35	5.663			#35	5.475
		#36	8.643			#36	3.961			#36	2.971
		#37	6.75			#37	5.737			#37	5.71
		#38	7.887			#38	8.063			#38	2.875
		#39	6.565			#39	5.726			#39	2.608
		#40	9.999			#40	8.807			#40	5.329
		#41	-3.007			#41	4.471			#41	6.662
		#42	4.988			#42	2.584			#42	3.364
		#43	-3.042			#43	2.036			#43	2.494
		#44	9.621			#44	2.214			#44	1.412
		#45	4.865			#45	1.86			#45	5.147
		#46	8.939			#46	2.821			#46	3.585
		#47	5.95			#47	5.77			#47	2.981
		#48	5.392			#48	4.861			#48	3.742
		#49	1.011			#49	2.761			#49	4.284
		#50	6.429			#50	5.446			#50	3.483
		#51	6.446			#51	-0.461			#51	4.226
		#52	4.411			#52	0.689			#52	3.813
		#53	0.431			#53	2.211			#53	4.073
		#54	5.452			#54	4.907			#54	6.103
		#55	-0.058			#55	2.234			#55	5.691
		#56	11.738			#56	-10.532			#56	5.65
		#57	2.806			#57	4.739			#57	5.229
		#58	0.971			#58	3.616			#58	6.779
		#59	3.452			#59	-2.885			#59	5.985
		#60	6.205			#60	-5.63			#60	4.759
		#61	-4.712			#61	-1.575			#61	2.265
		#62	0.447			#62	-6.703			#62	3.455
		#63	1.395			#63	-1.928			#63	3.191
		#64	-2.083			#64	-4.352			#64	2.053
		#65	-3.905			#65	-5.496			#65	1.32
		#66	1.782			#66	-2.523			#66	1.263
		#67	0.64			#67	-2.821			#67	2.951
		#68	1.39			#68	3.051			#68	3.189
		#69	2.568			#69	-2.95			#69	0.205
		#70	3.148			#70	-4.746			#70	0.962
		#71	4.291			#71	-3.24			#71	2.658
		#72	-3.116			#72	-6.174			#72	-0.462
		#73	0.564			#73	-1.741			#73	1.584
		#74	-0.94			#74	-3.433			#74	0.938
		#75	1.345			#75	-3.79			#75	2.181
		#76	-6.09			#76	-1.417			#76	1.342
		#77	-4.77			#77	-1.13			#77	3.341
		#78	2.628			#78	-2.567			#78	2.892
		#79	-2.601			#79	-5.788			#79	0.04
		#80	3.341			#80	-1.858			#80	2.45

## Sheet: Fig. 3h
Fig. 3h	Group	Cell ID	Red-Blue		Group	Cell ID	Red-Blue		Group	Cell ID	Red-Blue
	ALS-cluster rich	#1	7.724		ALS-cluster poor	#1	3.805		AC	#1	7.799
		#2	11.741			#2	7.57			#2	7.218
		#3	11.288			#3	7.004			#3	8.036
		#4	8.123			#4	11.361			#4	5.817
		#5	14.985			#5	14.34			#5	6.933
		#6	16.111			#6	7.416			#6	10.244
		#7	10.065			#7	5.921			#7	4.812
		#8	13.363			#8	6.037			#8	5.459
		#9	7.316			#9	6.257			#9	2.115
		#10	13.687			#10	5.772			#10	0.495
		#11	8.172			#11	5.389			#11	5.957
		#12	7.353			#12	6.229			#12	3.75
		#13	15.328			#13	6.861			#13	7.104
		#14	11.389			#14	6.633			#14	7.171
		#15	9.513			#15	6.535			#15	7.773
		#16	6.531			#16	7.107			#16	3.547
		#17	10.603			#17	5.799			#17	3.706
		#18	8.839			#18	9.151			#18	5.818
		#19	9.095			#19	8.936			#19	8.533
		#20	9.359			#20	10.124			#20	7.936
		#21	19.317			#21	9.375			#21	5.953
		#22	18.594			#22	14.173			#22	5.103
		#23	9.354			#23	7.893			#23	7.338
		#24	7.226			#24	8.98			#24	4.549
		#25	10.276			#25	5.026			#25	7.6
		#26	13.031			#26	5.495			#26	2.031
		#27	4.273			#27	8.311			#27	3.828
		#28	9.417			#28	4.02			#28	2.594
		#29	11.313			#29	6.589			#29	0.869
		#30	11.23			#30	6.817			#30	4.707
		#31	7.251			#31	7.582			#31	1.615
		#32	11.381			#32	9.713			#32	6.494

## Sheet: Fig. 5a
Fig. 5a	Cell type	Condition	pTDP-43(+/-)	GLS [normalized fluorescence]
	Iba1(+)	ALS	pTDP-43(+)	2.70867	1.5947	2.23128	1.85428	1.83515	1.74915	2.86154	1.32494	1.35758	1.5589
		ALS	pTDP-43(-)	1.16557	1.63331	0.79226	1.08238	1.2851	0.746627	1.75319
		Control	pTDP-43(+)	1.15662	1.19962	1.48325	0.881946	0.91389	1.01779	1.10906	0.837717
		Control	pTDP-43(-)	0.672385	0.894583	1.31915	0.772427	0.676247	0.987429	1.16487	0.913012
	Cell type	Condition	pTDP-43(+/-)	GLS2 [normalized fluorescence]
	Iba1(+)	ALS	pTDP-43(+)	1.6586	1.89301	1.22581	1.37618	0.840249	1.44345	1.18356	1.15761	1.10853
		ALS	pTDP-43(-)	1.16569	0.896017	1.36531	1.43055	0.833725	1.64275	0.813686	1.19086
		Control	pTDP-43(+)	1.00507	1.36375	0.653993	0.776714	0.821453	1.22628	0.827977	1.67553
		Control	pTDP-43(-)	0.602885	0.894619	0.777335	1.13556	0.780132	1.33222	1.0512	1.07528
	Cell type	Condition	pTDP-43(+/-)	TP53 [normalized fluorescence]
	Iba1(+)	ALS	pTDP-43(+)	2.51299	1.34814	1.43667	2.00767	1.55679	1.70902	1.84579	1.63172	2.42036
		ALS	pTDP-43(-)	1.43284	1.78871	0.989498	0.813746	0.948005	1.2304	1.67348
		Control	pTDP-43(+)	1.10935	1.39122	1.33585	1.07936	1.10684	1.2037	1.02412	1.28431	0.980248	0.778595
		Control	pTDP-43(-)	1.32078	0.835946	0.750581	0.858279	1.0298	0.731552	0.687284	0.798285	0.693891
	Cell type	Condition	pTDP-43(+/-)	GLS [normalized fluorescence]
	GFAP(+)	ALS	pTDP-43(+)	1.55304	0.746687	1.67996	1.77981	3.05745	2.29507	2.29507	2.13453	2.67549	1.65461
		ALS	pTDP-43(-)	1.58632	0.463705	1.70755	0.800663	0.359031	0.412489	1.11917
		Control	pTDP-43(+)	0.726166	0.389381	0.195898	1.56839	1.94121	1.95553	0.661499	0.881884	1.00104
		Control	pTDP-43(-)	0.601316	0.450254	0.416627	1.45406	2.00071	1.69445	0.523543	0.767726	0.700644	1.06968
	Cell type	Condition	pTDP-43(+/-)	GLS2 [normalized fluorescence]
	GFAP(+)	ALS	pTDP-43(+)	1.79928	1.39937	1.43714	1.5664	1.7986	1.13125	1.07724	1.58822	0.853455
		ALS	pTDP-43(-)	1.1109	1.79586	1.08145	1.28938	1.5482	0.846899	0.998862
		Control	pTDP-43(+)	0.866763	1.69311	1.30406	0.827623	1.01667	0.625267	0.841518	0.766564	1.32431	1.10777
		Control	pTDP-43(-)	1.1426	0.773609	0.987413	0.662744	0.854336	1.11159	1.10161	1.02274	0.969702
	Cell type	Condition	pTDP-43(+/-)	TP53 [normalized fluorescence]
	GFAP(+)	ALS	pTDP-43(+)	2.50962	1.22436	1.60378	1.71917	1.19145	1.01483	1.49202	1.3128	1.56923
		ALS	pTDP-43(-)	1.80716	1.73493	1.35922	1.46205	0.879996	1.08013	1.09997	1.05911	1.29892	0.675417
		Control	pTDP-43(+)	1.06069	0.861048	1.045	1.16017	0.708675	1.05596	0.792954	1.34768
		Control	pTDP-43(-)	0.929735	0.541498	0.75417	1.0753	1.40876	1.13461	1.12375
	Cell type	Condition	pTDP-43(+/-)	GLS [normalized fluorescence]
	NeuN(+)	ALS	pTDP-43(+)	1.35939	1.21048	2.34197	1.57692	1.79665	1.9217	2.02158	1.80392	1.88395
		ALS	pTDP-43(-)	2.02248	1.84789	1.73763	1.57692	1.10217	1.07519	0.77711
		Control	pTDP-43(+)	0.899429	0.86752	1.09906	1.08375	0.906434
		Control	pTDP-43(-)	1.06572	1.18648	1.1595	0.833405	0.901894	1.19297	0.803831
	Cell type	Condition	pTDP-43(+/-)	GLS2 [normalized fluorescence]
	NeuN(+)	ALS	pTDP-43(+)	0.794999	1.55425	1.96543	2.79554	0.875266	0.786979	2.33285	2.56885	0.982327	0.840665
		ALS	pTDP-43(-)	0.51575	0.949278	1.19598	1.16821	0.823907	0.95176	2.25465	1.91454	1.02515
		Control	pTDP-43(+)	0.423477	0.782945	0.687676	0.753774	0.62437	0.732983	1.49886	0.819563	1.17876	1.54386
		Control	pTDP-43(-)	0.417136	0.539496	0.594113	0.540738	0.614129	0.63399	1.46457	1.14975	1.11887	1.39335
	Cell type	Condition	pTDP-43(+/-)	TP53 [normalized fluorescence]
	NeuN(+)	ALS	pTDP-43(+)	2.2705	2.39387	2.80191	2.61829	2.87373	1.87429	1.85851	2.54239	2.86026	1.75949
		ALS	pTDP-43(-)	1.62932	1.58104	1.06772	0.789432	1.28997	2.30546	0.990054
		Control	pTDP-43(+)	1.42272	1.1647	1.50854	0.889403	0.567863	1.23828	1.19149	0.815274
		Control	pTDP-43(-)	0.688236	0.705374	0.991822	1.06282	0.787527	0.944897	0.987062	1.03399
	Cell type	Condition	pTDP-43(+/-)	GLS [normalized fluorescence]
	Olig2(+)	ALS	pTDP-43(+)	0.901637	0.808703	0.900954	1.35334	0.661318	2.07307	1.28552
		ALS	pTDP-43(-)	1.59926	0.887035	0.662683	0.693252	0.776087	1.26505	0.772812
		Control	pTDP-43(+)	0.913236	1.0149	0.561971	1.08764	1.24676	1.20855	1.04834
		Control	pTDP-43(-)	0.674556	1.03715	1.18112	1.16283	0.864108	0.651083	1.34775
	Cell type	Condition	pTDP-43(+/-)	GLS2 [normalized fluorescence]
	Olig2(+)	ALS	pTDP-43(+)	1.20945	1.08819	0.87549	0.910042	1.566	0.993072	1.11092	1.50084
		ALS	pTDP-43(-)	1.16386	0.843435	0.970213	0.814269	0.798241	1.13759	1.02868	1.07768
		Control	pTDP-43(+)	0.932639	0.865243	1.1297	0.972446	1.12405	1.13759	0.92607
		Control	pTDP-43(-)	1.1435	0.975205	1.28446	0.769076	0.75226	0.778535	1.10737	1.10185
	Cell type	Condition	pTDP-43(+/-)	TP53 [normalized fluorescence]
	Olig2(+)	ALS	pTDP-43(+)	1.30405	1.28785	2.05607	1.43108	1.53683	0.982829	1.24109	1.66608
		ALS	pTDP-43(-)	1.06768	0.681153	0.745718	1.30355	1.29873	1.34573	1.7659	1.3633	1.4693
		Control	pTDP-43(+)	0.74745	0.6767	0.835021	1.52508	1.9967	0.748934	0.787278	0.791978	0.859635
		Control	pTDP-43(-)	1.30182	0.907998	0.663094	1.39743	0.829332	1.27486	0.93793

## Sheet: Fig. 5b
Fig. 5b	Cell type	Condition	pTDP-43(+/-)	GLS [normalized fluorescence]
	Iba1(+)	ALS	pTDP-43(+)	2.62131	2.07156	2.1903	1.65719	2.00899	3.28095	1.23045	1.2535	1.77547	1.62331
		ALS	pTDP-43(-)	1.59583	2.3121	2.11002	2.21442	1.1578	0.855303	1.11873	0.305705	1.03067	2.42489
		Control	pTDP-43(+)	1.07035	0.937873	1.09385	0.893612	0.848893	1.05829	1.06531	1.04669
		Control	pTDP-43(-)	1.14498	0.870871	0.634915	1.0734	0.953898	1.35469	1.05493	0.897427
	Cell type	Condition	pTDP-43(+/-)	GLS2 [normalized fluorescence]
	Iba1(+)	ALS	pTDP-43(+)	1.15485	1.06335	1.02851	1.03203	0.947387	0.68397	1.72286	1.67517
		ALS	pTDP-43(-)	0.909203	0.85483	1.08182	0.953546	0.758578	1.6215	1.62027
		Control	pTDP-43(+)	0.719514	0.733064	0.644378	1.33855	0.708957	1.45856	1.18916	1.00933	1.1918
		Control	pTDP-43(-)	1.12089	0.726553	1.08904	0.90586	1.01355	0.858701	1.2921
	Cell type	Condition	pTDP-43(+/-)	TP53 [normalized fluorescence]
	Iba1(+)	ALS	pTDP-43(+)	1.60971	2.15831	1.47103	1.43794	1.2175	2.12422	2.6849	2.25562	2.52686
		ALS	pTDP-43(-)	1.74624	1.61683	1.39838	1.37472	1.27145	1.54401	1.51456	1.41543
		Control	pTDP-43(+)	1.13459	0.967781	0.78624	1.47418	0.994922	0.852104	0.649214	1.03083
		Control	pTDP-43(-)	1.43132	1.11126	1.00932	1.10911	1.27956	0.691249	0.541977	0.936338
	Cell type	Condition	pTDP-43(+/-)	GLS [normalized fluorescence]
	GFAP(+)	ALS	pTDP-43(+)	1.77773	1.2288	0.82131	1.63274	1.51956	2.79518	1.17982	1.67422	2.12932	2.39796
		ALS	pTDP-43(-)	1.01508	0.949899	1.33567	1.06407	1.21577	1.08086	1.08639
		Control	pTDP-43(+)	1.05913	0.935282	1.10338	1.26475	1.14426	0.644525	0.960763
		Control	pTDP-43(-)	1.0858	0.742103	1.11147	0.66013	1.54722	0.794447	0.946739
	Cell type	Condition	pTDP-43(+/-)	GLS2 [normalized fluorescence]
	GFAP(+)	ALS	pTDP-43(+)	0.736939	0.625194	1.10228	0.701296	0.976564	2.21587	2.36447	1.67882	2.311	1.34889
		ALS	pTDP-43(-)	0.54283	0.577991	0.642774	0.917802	1.25448	1.60778	1.30554	1.35178
		Control	pTDP-43(+)	1.33636	0.889384	1.33516	1.05628	0.561374	0.667098	1.5377	0.930084	0.613634
		Control	pTDP-43(-)	1.26243	1.1608	2.08968	0.738384	0.613152	0.570766	0.637717
	Cell type	Condition	pTDP-43(+/-)	TP53 [normalized fluorescence]
	GFAP(+)	ALS	pTDP-43(+)	1.21295	0.939789	0.936423	1.65437	2.11399	1.62856	1.31941	2.1315	1.83974
		ALS	pTDP-43(-)	1.15279	0.913641	0.532581	0.602687	1.51859	1.05725	1.52978
		Control	pTDP-43(+)	1.75084	0.893288	1.30036	1.11378	0.321697	1.14657	0.747422	0.925966
		Control	pTDP-43(-)	1.31019	0.862871	0.654475	0.731252	1.46805	0.935804	0.837429
	Cell type	Condition	pTDP-43(+/-)	GLS [normalized fluorescence]
	NeuN(+)	ALS	pTDP-43(+)	1.21679	1.22558	1.75602	1.04205	1.10323	1.04502	1.61536	1.67305	1.57085
		ALS	pTDP-43(-)	0.610029	0.643482	1.14487	0.59448	1.42241	1.5106	0.36522	1.10834
		Control	pTDP-43(+)	1.34037	0.600208	0.932794	1.11765	1.01863	0.888497	0.686654	1.1998
		Control	pTDP-43(-)	0.948344	1.34681	1.19162	1.57761	0.573201	0.826808	0.719493	1.03152
	Cell type	Condition	pTDP-43(+/-)	GLS2 [normalized fluorescence]
	NeuN(+)	ALS	pTDP-43(+)	0.702751	1.79443	2.27911	1.69744	1.54086	3.34967	1.16036	1.56691	1.25916
		ALS	pTDP-43(-)	0.632036	1.31244	1.36483	1.95699	1.48338	1.63547	3.15927	1.16605	1.81239
		Control	pTDP-43(+)	0.663455	0.618501	2.08452	0.565812	1.99291	0.858597	0.426904	0.70951	0.606826
		Control	pTDP-43(-)	0.439621	1.0475	1.31514	0.701726	1.01667	0.525696	0.7143	1.81539
	Cell type	Condition	pTDP-43(+/-)	TP53 [normalized fluorescence]
	NeuN(+)	ALS	pTDP-43(+)	1.08931	1.21848	1.32014	1.64555	1.54871	2.6081	2.6406	3.0474	1.00583	1.28877
		ALS	pTDP-43(-)	1.28974	2.0501	2.17975	1.34314	1.4929	0.850762	1.36276	1.09558	0.856553	0.679934
		Control	pTDP-43(+)	0.442351	0.943254	0.556558	0.861379	0.74878	1.24743	1.49611	1.59649	1.47584
		Control	pTDP-43(-)	1.12164	0.930546	0.956444	0.790281	0.669961	0.970921	1.10041	1.04298	1.04861
	Cell type	Condition	pTDP-43(+/-)	GLS [normalized fluorescence]
	Olig2(+)	ALS	pTDP-43(+)	1.29419	1.33834	1.35471	0.834143	1.34992	0.814578	0.749107	0.810543	0.723452	1.22963
		ALS	pTDP-43(-)	1.60967	0.634305	1.54846	0.762049	0.657905	0.726878	1.37953	0.733577	0.645725	0.952371
		Control	pTDP-43(+)	0.738906	0.769129	1.38219	1.32426	1.35623	1.49578	0.523462	0.362221	1.09717
		Control	pTDP-43(-)	0.385973	0.573631	0.540819	1.6102	1.33203	1.49349	1.0438	1.41211	0.997896	0.560689
	Cell type	Condition	pTDP-43(+/-)	GLS2 [normalized fluorescence]
	Olig2(+)	ALS	pTDP-43(+)	1.03428	1.30651	1.116	1.13046	1.23803	1.18894	1.59167
		ALS	pTDP-43(-)	1.10861	1.0963	1.00458	0.916251	1.1123	1.16924	1.19417
		Control	pTDP-43(+)	0.776058	0.839153	1.01828	0.741434	1.16847	0.744511	1.35437	1.70954	0.80976
		Control	pTDP-43(-)	2.03733	0.810222	0.55015	0.479054	0.6451	1.31436	1.2268	0.804528	0.970881
	Cell type	Condition	pTDP-43(+/-)	TP53 [normalized fluorescence]
	Olig2(+)	ALS	pTDP-43(+)	1.24998	1.60522	1.45634	0.953844	1.79979	1.85875	1.25042	2.26278	1.49275	1.80156
		ALS	pTDP-43(-)	2.13734	1.8188	0.947801	0.886187	1.33591	1.10051	1.28521
		Control	pTDP-43(+)	1.4556	0.451348	0.599488	0.46255	1.24423	1.17495	0.791554	1.26604	1.63234
		Control	pTDP-43(-)	1.15667	1.81055	0.632653	1.2544	1.09004	0.518121	0.459455

## Sheet: Supplementary Fig. 7b
Supplementary Fig. 7b	Sample_name	Celltype	Cell count
	1_ALS	Astro_1	64
		Astro_2	28
		Astro_3	18
		Astro_4	8
		Astro_5	25
		Immune_1	26
		Immune_2	19
		Immune_3	7
		Excit_1	51
		Excit_2	40
		Excit_3	44
		Excit_4	40
		Excit_5	26
		Inhibit_1	21
		Inhibit_2	14
		Others	226
	2_ALS	Astro_1	83
		Astro_2	40
		Astro_3	31
		Astro_4	27
		Astro_5	25
		Immune_1	31
		Immune_2	13
		Immune_3	17
		Excit_1	87
		Excit_2	75
		Excit_3	62
		Excit_4	66
		Excit_5	60
		Inhibit_1	47
		Inhibit_2	37
		Others	283
	4_ALS-1	Astro_1	107
		Astro_2	69
		Astro_3	40
		Astro_4	42
		Astro_5	33
		Immune_1	59
		Immune_2	23
		Immune_3	35
		Excit_1	162
		Excit_2	104
		Excit_3	124
		Excit_4	99
		Excit_5	79
		Inhibit_1	54
		Inhibit_2	50
		Others	512
	4_ALS-2	Astro_1	60
		Astro_2	16
		Astro_3	26
		Astro_4	18
		Astro_5	21
		Immune_1	24
		Immune_2	9
		Immune_3	7
		Excit_1	104
		Excit_2	50
		Excit_3	62
		Excit_4	40
		Excit_5	42
		Inhibit_1	35
		Inhibit_2	31
		Others	280
	6_ALS	Astro_1	112
		Astro_2	72
		Astro_3	88
		Astro_4	69
		Astro_5	44
		Immune_1	46
		Immune_2	27
		Immune_3	27
		Excit_1	108
		Excit_2	108
		Excit_3	127
		Excit_4	72
		Excit_5	65
		Inhibit_1	17
		Inhibit_2	23
		Others	497
	8_AC	Astro_1	131
		Astro_2	66
		Astro_3	63
		Astro_4	49
		Astro_5	26
		Immune_1	43
		Immune_2	22
		Immune_3	34
		Excit_1	138
		Excit_2	168
		Excit_3	149
		Excit_4	110
		Excit_5	89
		Inhibit_1	59
		Inhibit_2	57
		Others	480
	9_AC	Astro_1	114
		Astro_2	65
		Astro_3	50
		Astro_4	21
		Astro_5	19
		Immune_1	38
		Immune_2	55
		Immune_3	49
		Excit_1	135
		Excit_2	146
		Excit_3	119
		Excit_4	124
		Excit_5	83
		Inhibit_1	56
		Inhibit_2	43
		Others	548
	11_AC	Astro_1	171
		Astro_2	79
		Astro_3	84
		Astro_4	39
		Astro_5	28
		Immune_1	62
		Immune_2	37
		Immune_3	34
		Excit_1	175
		Excit_2	171
		Excit_3	124
		Excit_4	132
		Excit_5	128
		Inhibit_1	76
		Inhibit_2	62
		Others	565
	12_AC	Astro_1	85
		Astro_2	79
		Astro_3	76
		Astro_4	63
		Astro_5	41
		Immune_1	51
		Immune_2	45
		Immune_3	18
		Excit_1	100
		Excit_2	95
		Excit_3	78
		Excit_4	74
		Excit_5	65
		Inhibit_1	31
		Inhibit_2	23
		Others	381

## Sheet: Supplementary Fig. 7g
Supplementary Fig. 7g	Sample_name	Celltype	Cell count
	1_ALS	Astro_1	72
		Astro_2	38
		Astro_3	14
		Immune_1	99
		Immune_2	44
		Immune_3	66
		Immune_4	41
		Neuron_1	62
		Neuron_2	98
		Others	232
	2_ALS	Astro_1	70
		Astro_2	35
		Astro_3	18
		Immune_1	91
		Immune_2	54
		Immune_3	63
		Immune_4	51
		Neuron_1	109
		Neuron_2	49
		Others	248
	3_ALS	Astro_1	105
		Astro_2	61
		Astro_3	19
		Immune_1	187
		Immune_2	69
		Immune_3	74
		Immune_4	72
		Neuron_1	130
		Neuron_2	87
		Others	362
	4_ALS	Astro_1	66
		Astro_2	56
		Astro_3	29
		Immune_1	117
		Immune_2	81
		Immune_3	83
		Immune_4	57
		Neuron_1	171
		Neuron_2	119
		Others	347
	6_ALS	Astro_1	58
		Astro_2	56
		Astro_3	12
		Immune_1	123
		Immune_2	74
		Immune_3	51
		Immune_4	38
		Neuron_1	63
		Neuron_2	60
		Others	236
	8_AC	Astro_1	32
		Astro_2	17
		Astro_3	57
		Immune_1	72
		Immune_2	42
		Immune_3	40
		Immune_4	30
		Neuron_1	94
		Neuron_2	131
		Others	234
	9_AC	Astro_1	39
		Astro_2	30
		Astro_3	38
		Immune_1	111
		Immune_2	24
		Immune_3	23
		Immune_4	48
		Neuron_1	139
		Neuron_2	51
		Others	178
	11_AC	Astro_1	92
		Astro_2	48
		Astro_3	15
		Immune_1	207
		Immune_2	46
		Immune_3	28
		Immune_4	50
		Neuron_1	97
		Neuron_2	46
		Others	257
	12_AC	Astro_1	87
		Astro_2	48
		Astro_3	26
		Immune_1	143
		Immune_2	111
		Immune_3	51
		Immune_4	61
		Neuron_1	115
		Neuron_2	98
		Others	283

## Sheet: Supplementary Fig. 9b
Supplementary Fig. 9b	Sample_name	Celltype	Cell count
	1_ALS	Astro_1	161
		Astro_2	97
		Astro_3	108
		Astro_4	57
		Astro_5	29
		Astro_6	42
		Immune_1	53
		Immune_2	36
		Immune_3	25
		Neuron_1	38
		Neuron_2	53
		Neuron_3	32
		Neuron_4	23
		Neuron_5	16
		Others	830
	2_ALS	Astro_1	89
		Astro_2	40
		Astro_3	56
		Astro_4	40
		Astro_5	18
		Astro_6	19
		Immune_1	46
		Immune_2	40
		Immune_3	61
		Neuron_1	18
		Neuron_2	32
		Neuron_3	11
		Neuron_4	32
		Neuron_5	10
		Others	561
	3_ALS	Astro_1	82
		Astro_2	51
		Astro_3	81
		Astro_4	39
		Astro_5	20
		Astro_6	29
		Immune_1	41
		Immune_2	35
		Immune_3	18
		Neuron_1	32
		Neuron_2	26
		Neuron_3	21
		Neuron_4	21
		Neuron_5	13
		Others	153
	4_ALS	Astro_1	104
		Astro_2	63
		Astro_3	79
		Astro_4	42
		Astro_5	36
		Astro_6	43
		Immune_1	45
		Immune_2	24
		Immune_3	33
		Neuron_1	43
		Neuron_2	32
		Neuron_3	13
		Neuron_4	20
		Neuron_5	9
		Others	736
	6_ALS	Astro_1	220
		Astro_2	167
		Astro_3	70
		Astro_4	68
		Astro_5	38
		Astro_6	17
		Immune_1	77
		Immune_2	72
		Immune_3	118
		Neuron_1	9
		Neuron_2	29
		Neuron_3	11
		Neuron_4	16
		Neuron_5	19
		Others	1065
	7_AC-1	Astro_1	321
		Astro_2	264
		Astro_3	143
		Astro_4	80
		Astro_5	70
		Astro_6	39
		Immune_1	117
		Immune_2	90
		Immune_3	46
		Neuron_1	80
		Neuron_2	61
		Neuron_3	70
		Neuron_4	51
		Neuron_5	26
		Others	969
	7_AC-2	Astro_1	130
		Astro_2	81
		Astro_3	67
		Astro_4	36
		Astro_5	22
		Astro_6	9
		Immune_1	47
		Immune_2	27
		Immune_3	17
		Neuron_1	5
		Neuron_2	13
		Neuron_3	25
		Neuron_4	21
		Neuron_5	8
		Others	69
	8_AC	Astro_1	117
		Astro_2	65
		Astro_3	137
		Astro_4	52
		Astro_5	39
		Astro_6	46
		Immune_1	61
		Immune_2	73
		Immune_3	51
		Neuron_1	110
		Neuron_2	54
		Neuron_3	44
		Neuron_4	52
		Neuron_5	29
		Others	195
	9_AC	Astro_1	163
		Astro_2	59
		Astro_3	139
		Astro_4	61
		Astro_5	34
		Astro_6	44
		Immune_1	51
		Immune_2	72
		Immune_3	37
		Neuron_1	92
		Neuron_2	59
		Neuron_3	48
		Neuron_4	57
		Neuron_5	21
		Others	850
	11_AC	Astro_1	210
		Astro_2	214
		Astro_3	136
		Astro_4	69
		Astro_5	40
		Astro_6	59
		Immune_1	95
		Immune_2	85
		Immune_3	110
		Neuron_1	82
		Neuron_2	51
		Neuron_3	59
		Neuron_4	41
		Neuron_5	29
		Others	636
	12_AC	Astro_1	168
		Astro_2	213
		Astro_3	90
		Astro_4	54
		Astro_5	46
		Astro_6	34
		Immune_1	99
		Immune_2	53
		Immune_3	49
		Neuron_1	57
		Neuron_2	36
		Neuron_3	66
		Neuron_4	24
		Neuron_5	20
		Others	849

[truncated: 3 more sheets: Supplementary Fig. 10b, Supplementary Fig. 12a, Supplementary Fig. 12b]
